# Supplementary material for: Responsive aqueous foams stabilised by silica nanoparticles hydrophobised in situ with a switchable surfactant
Source: Royal Society of Chemistry journal article supplement (doi:10.1039/c4sm01970a), 2014-10-13
Supplement: c4sm01970a1.pdf [file c4sm01970a1.pdf]

Electronic Supplementary Information (ESI)

**Responsive aqueous foams stabilised by silica nanoparticles  
hydrophobised *in situ* with a switchable surfactant**

Yue Zhu <sup>a</sup>, Jiangzhong Jiang <sup>a</sup>, Zhenggang Cui <sup>a\*</sup> and Bernard P. Binks <sup>b\*</sup>

<sup>a</sup> *Key Laboratory of Food Colloids and Biotechnology, Ministry of Education, School of Chemical and Material Engineering, Jiangnan University, 1800 Lihu Road, Wuxi, Jiangsu, 214122, P.R. China. E-mail: cuizhenggang@hotmail.com*

<sup>b</sup> *Surfactant and Colloid Group, Department of Chemistry, University of Hull, Hull, HU6 7RX. UK  
E-mail: b.p.binks@hull.ac.uk*

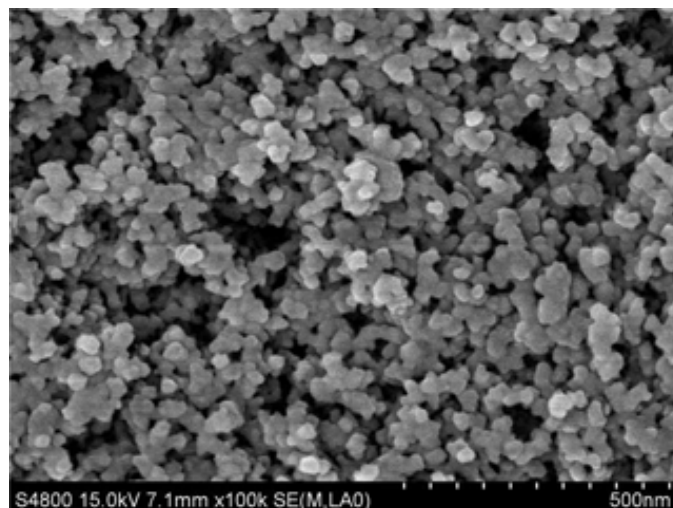

**Figure S1.** Scanning electron microscopy image<sup>41</sup> of powdered silica nanoparticles (HL-200) with a BET surface area of  $200 \pm 20 \text{ m}^2 \text{ g}^{-1}$ .

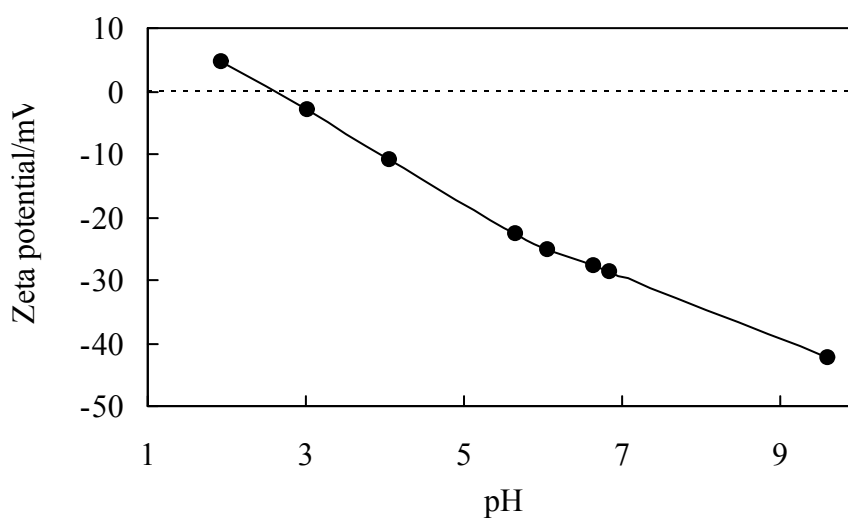

**Figure S2.** Zeta potentials of 0.1 wt.% silica nanoparticles dispersed in aqueous solutions of different pH, measured 24 hr. after dispersion at 25°C.

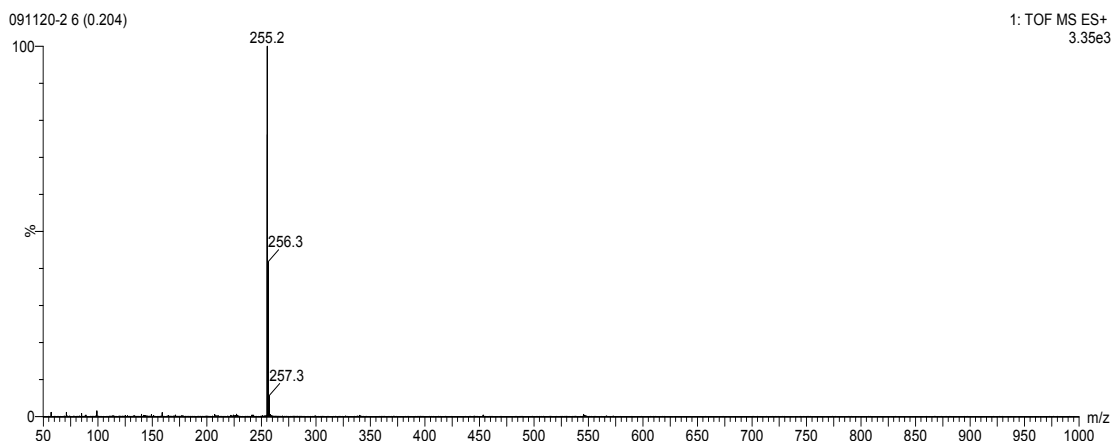

**Figure S3.** Mass spectrum of *N'*-dodecyl-*N,N*-dimethylacetamidinium bicarbonate.<sup>41</sup>

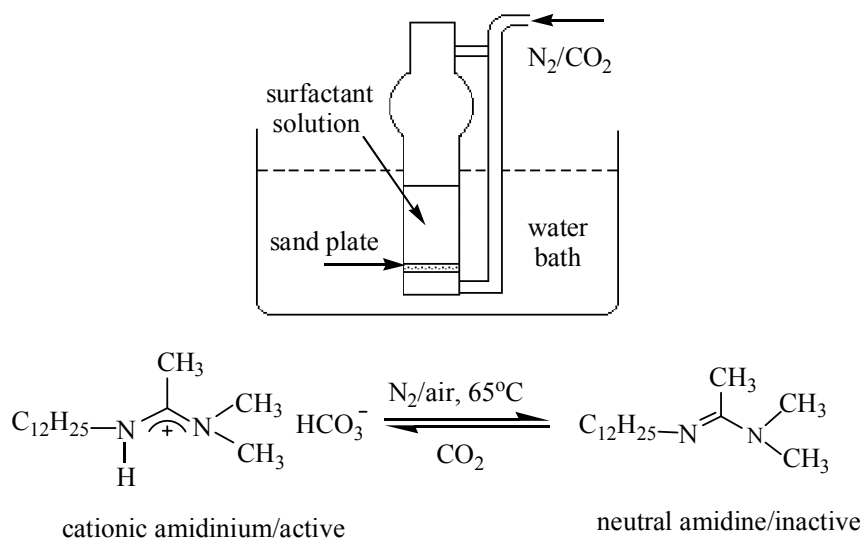

**Figure S4.** Illustration of inter-conversion between surface-active form (cationic amidinium) and surface-inactive form (neutral amidine) of *N'*-dodecyl-*N,N*-dimethylacetamidinium bicarbonate in a glass bubbling device at controlled temperatures by bubbling with  $\text{N}_2$  and  $\text{CO}_2$  respectively.<sup>41</sup>

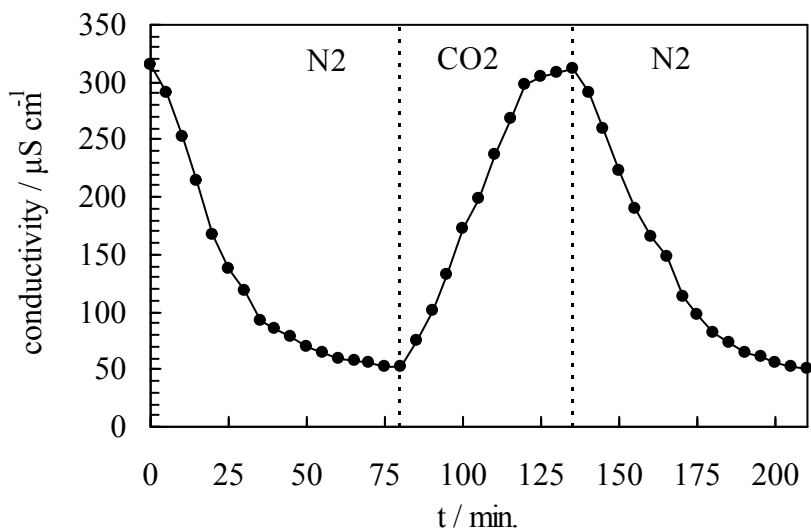

**Figure S5.** Conductivity variation of *N*-dodecyl-*N,N*-dimethylacetamidinium bicarbonate aqueous solution (1 mM) upon bubbling with  $\text{N}_2$  at 65 °C and  $\text{CO}_2$  at 0-5 °C respectively at a flow rate of 160 mL/min.<sup>41</sup> For conductivity measurements the bubbling device containing the sample was removed from the water/ice bath for around 1 min. (the temperature is then close to room temperature, *ca.* 20 °C). The exact conductivities of the solution at 65 °C/0-5 °C just before bubbling  $\text{N}_2$  and after bubbling  $\text{N}_2$  for 80 min. (just before bubbling  $\text{CO}_2$ ) are 352/286  $\mu\text{S cm}^{-1}$  and 63/50  $\mu\text{S cm}^{-1}$ , respectively.

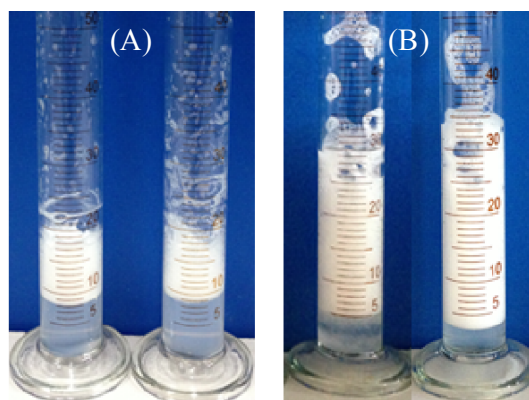

**Figure S6.** Photographs of foams stabilized by 0.5 wt.% silica nanoparticles in combination with either 0.3 mM *N*-dodecyl-*N,N*-dimethylacetamidinium bicarbonate (A) kept at 25 °C (left) and 65 °C for 80 min. (right) without bubbling with N<sub>2</sub>, or 0.3 mM CTAB (B) kept at 25 °C (left) and by bubbling with N<sub>2</sub> (160 mL/min.) at 65 °C for 80 min. (right).
